# Supplementary material
Source: publisher figshare collection journal article supplement (https://tandf.figshare.com/articles/dataset/_/9993299)

**
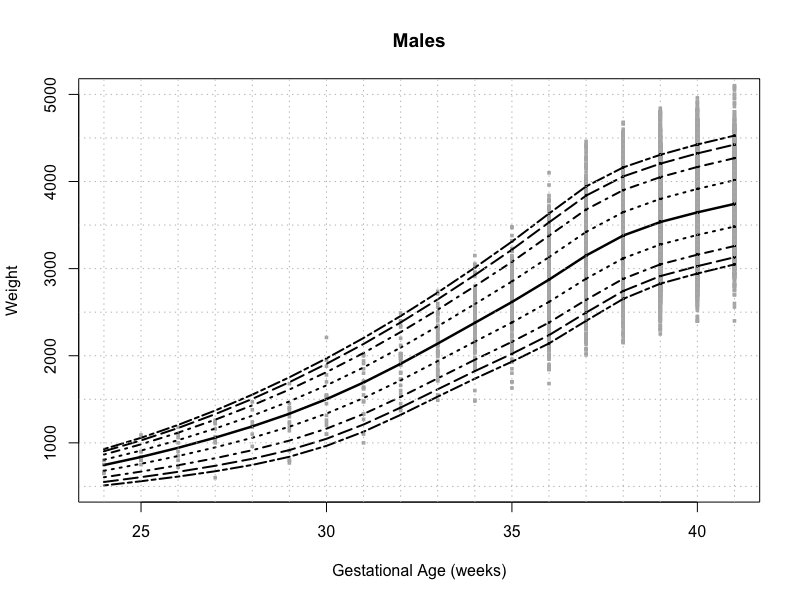
**

**Figure 2.** Centile curves (3rd, 5th, 10th, 25th, 50th, 75th and 90th, 95th and 97th) and empirical data points for males**.**

Supplement: Supplementary file 1 [file 1]
